# Supplementary material for: Simultaneous Determination and Stability Analysis of Ten New Psychoactive Substances including Synthetic Cathinones, Phenethylamines, and Ketamine Substitutes in Urine Using Liquid Chromatography-Tandem Mass Spectrometry
Source: Hindawi journal article supplement (doi:10.1155/2023/9895595), 2023-07-17
Supplement: f1 [file 9895595.f1.pdf]

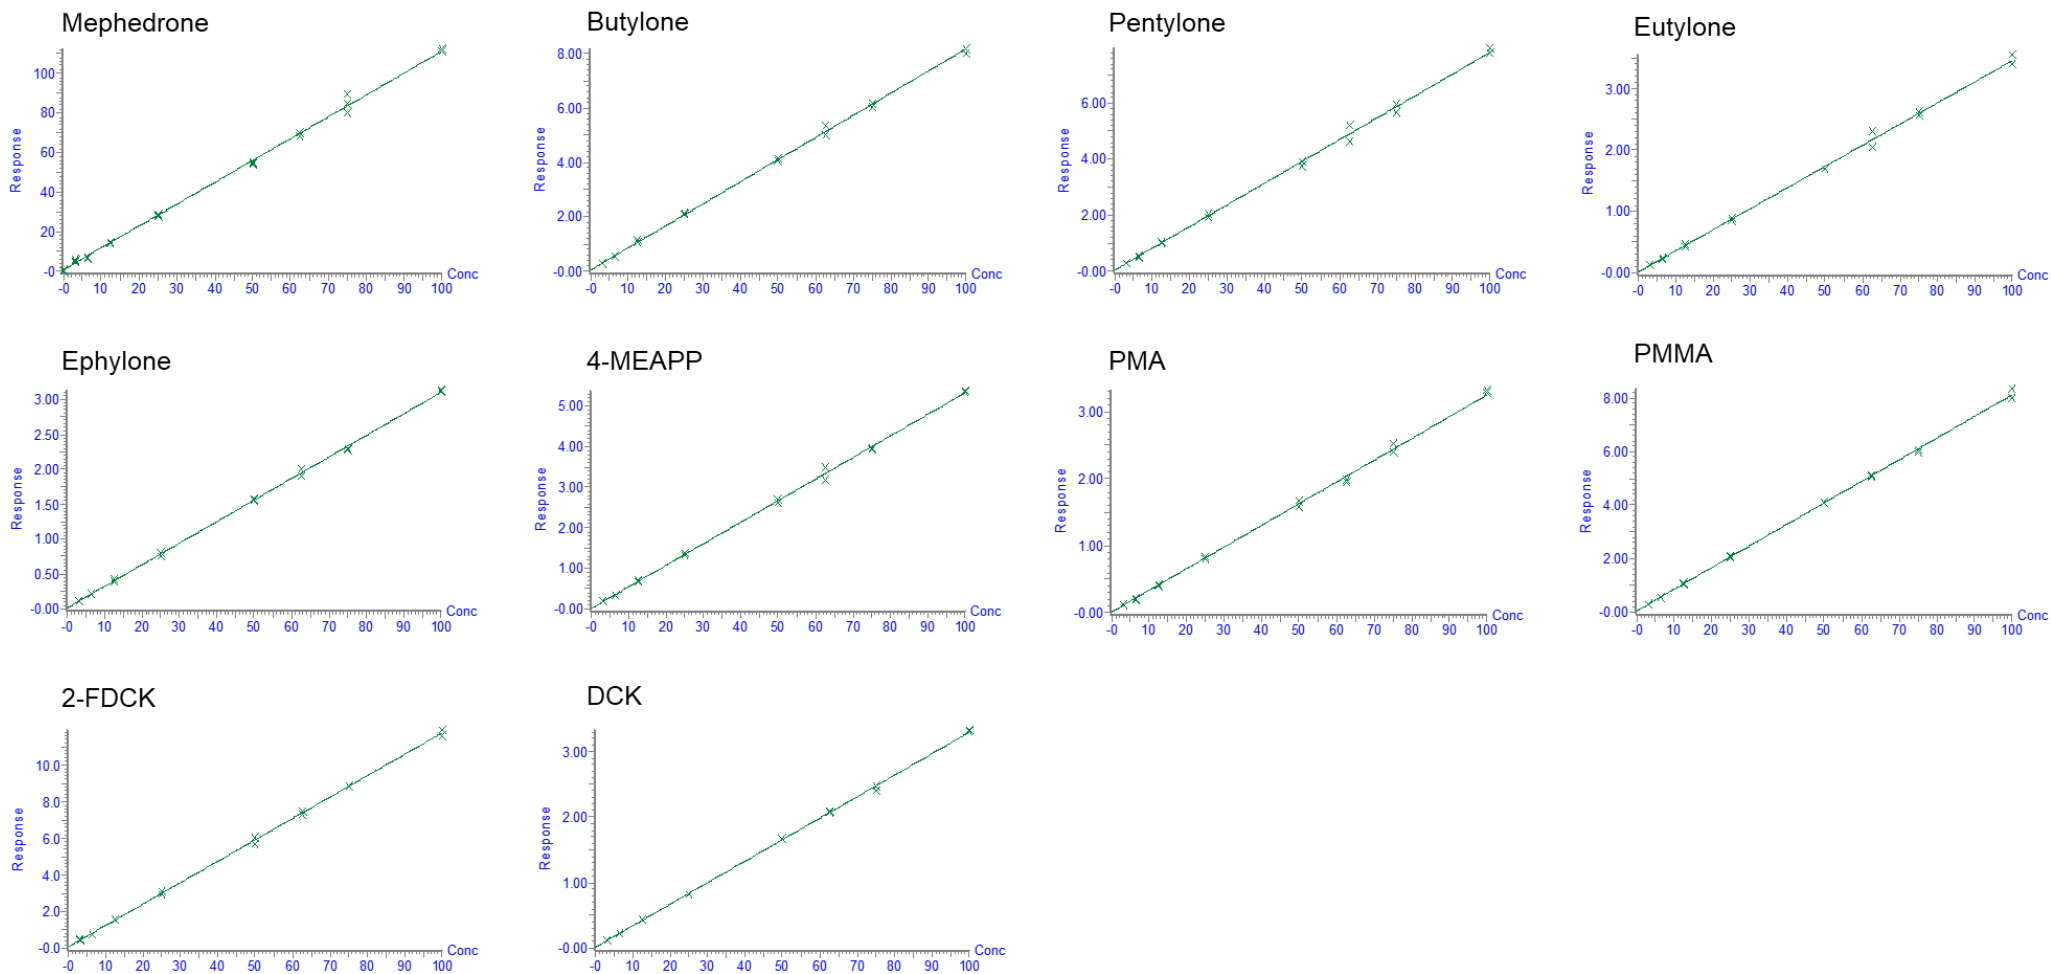

**Figure S1. Calibration curves for the analytes.** All the calibration curves were assessed at 3.1, 6.2, 12.5, 25, 50, 62.5, 75, and 100 ng/mL. Mephedrone: 4-methylmethcathinone; Ephylone: N-ethylpentylone; 4-MEAPP: 4-methyl- $\alpha$ -ethylaminopentiophenone; PMA: para-methoxyamphetamine; PMMA: para-methoxymethamphetamine; DCK: deschloroketamine; 2-FDCK: 2-fluorodeschloroketamine.

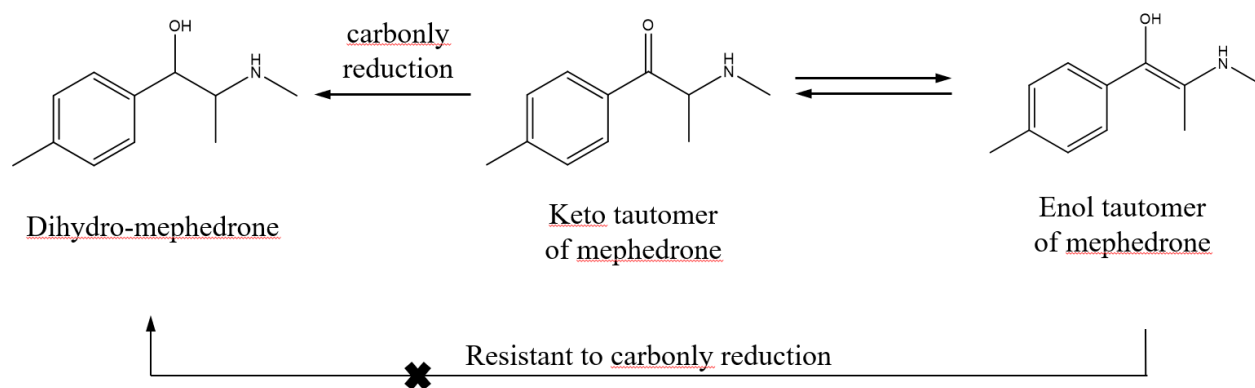

**Figure S2. Keto-enol tautomers and carbonyl reduction from the keto tautomer of mephedrone.**

**Table S1:** The details of the percentage of the target concentration for the analytes in different matrices and storage temperatures.

| Compound                 | Solvent             | Storage temperature (°C) | % difference between days 0 and 7 | % difference between days 0 and 14 | % difference between days 0 and 30 | % difference between days 0 and 60 | % difference between days 0 and 90 | First unstable day of analysis |
|--------------------------|---------------------|--------------------------|-----------------------------------|------------------------------------|------------------------------------|------------------------------------|------------------------------------|--------------------------------|
| Mephedrone<br>(50 ng/mL) | 50%MeOH             | -20                      | 4.88±4.35                         | 8.48±0.61                          | 8.89±5.47                          | 7.87±0.89                          | 2.78±2.29                          | --                             |
|                          |                     | 4                        | 3.26±3.08                         | 1.70±1.50                          | 4.41±10.3                          | -4.34±3.70                         | -13.84±5.62                        | --                             |
|                          |                     | 25                       | -3.93±2.67                        | <b>-49.53±1.62</b>                 | <b>-88.87±0.82</b>                 | <b>-98.91±0.12</b>                 | <b>-99.53±0.24</b>                 | day 14                         |
|                          | 50%MeOH (in 0.1%FA) | -20                      | 5.16±3.67                         | -3.98±3.07                         | 3.98±2.26                          | 1.70±5.57                          | -5.09±2.75                         | --                             |
|                          |                     | 4                        | 0.00±6.18                         | -3.26±5.80                         | 12.14±9.89                         | 4.05±7.09                          | -3.33±1.00                         | --                             |
|                          |                     | 25                       | 1.24±3.46                         | -0.07±3.76                         | 19.06±2.04                         | 16.51±1.04                         | 15.01±6.15                         | --                             |
|                          | Urine               | -20                      | 1.98±4.24                         | -5.36±2.53                         | 7.67±8.16                          | -1.65±6.49                         | -12.17±3.85                        | --                             |
|                          |                     | 4                        | -6.81±4.53                        | <b>-20.90±3.66</b>                 | <b>-42.66±3.10</b>                 | <b>-63.96±0.94</b>                 | <b>-83.60±0.03</b>                 | day 14                         |
|                          |                     | 25                       | <b>-68.65±1.21</b>                | <b>-96.43±0.06</b>                 | <b>-99.67±0.30</b>                 | <b>-99.93±0.11</b>                 | <b>-99.60±0.20</b>                 | day 7                          |
| Butylone<br>(50 ng/mL)   | 50%MeOH             | -20                      | -0.87±1.01                        | 2.55±1.21                          | 3.49±3.39                          | 13.76±5.28                         | 2.75±2.56                          | --                             |
|                          |                     | 4                        | 3.83±1.93                         | -1.34±3.69                         | 8.59±3.85                          | 8.86±6.96                          | 2.55±7.67                          | --                             |
|                          |                     | 25                       | 1.54±3.38                         | -9.46±1.28                         | <b>-24.43±1.61</b>                 | <b>-40.74±1.03</b>                 | <b>-64.5±0.31</b>                  | day 30                         |
|                          | 50%MeOH (in 0.1%FA) | -20                      | -0.71±1.25                        | -5.63±1.54                         | -3.69±5.75                         | -1.49±4.60                         | -1.75±2.70                         | --                             |
|                          |                     | 4                        | -4.01±2.61                        | -4.72±6.99                         | 9.64±11.38                         | 6.86±8.11                          | -4.40±0.98                         | --                             |
|                          |                     | 25                       | -2.14±3.70                        | -2.98±2.79                         | 11.65±1.08                         | 18.90±4.28                         | <b>20.39±6.70</b>                  | day 90                         |
|                          | Urine               | -20                      | 1.48±2.96                         | -9.79±2.28                         | 2.96±4.95                          | 2.90±4.85                          | -6.63±1.10                         | --                             |
|                          |                     | 4                        | -1.67±5.99                        | -8.82±6.91                         | -10.11±2.71                        | -6.31±1.90                         | <b>-30.01±1.64</b>                 | day 90                         |
|                          |                     | 25                       | -19.25±4.42                       | <b>-48.42±1.90</b>                 | <b>-88.15±0.73</b>                 | <b>-100±0.00</b>                   | <b>-99.87±0.11</b>                 | day 14                         |
| Pentylone<br>(50 ng/mL)  | 50%MeOH             | -20                      | 7.57±4.87                         | 11.49±1.10                         | 11.71±2.58                         | 15.27±4.87                         | 13.85±6.89                         | --                             |
|                          |                     | 4                        | 7.07±4.42                         | 3.43±1.83                          | 17.42±8.15                         | 12.92±5.07                         | 11.56±7.15                         | --                             |
|                          |                     | 25                       | 2.78±0.37                         | -10.35±2.79                        | <b>-27.84±1.19</b>                 | <b>-61.03±1.7</b>                  | <b>-79.37±0.69</b>                 | day 30                         |
|                          | 50%MeOH (in 0.1%FA) | -20                      | 9.62±6.87                         | 4.85±1.82                          | 9.05±3.15                          | 8.34±5.43                          | 12.19±3.33                         | --                             |
|                          |                     | 4                        | 3.92±2.06                         | 3.49±5.35                          | 9.48±15.16                         | 14.04±5.79                         | 10.83±0.54                         | --                             |
|                          |                     | 25                       | 4.92±2.79                         | 6.91±4.53                          | <b>22.59±0.99</b>                  | <b>26.09±1.46*</b>                 | <b>37.78±4.86</b>                  | day 30                         |
|                          | Urine               | -20                      | 2.73±1.88                         | -3.96±3.62                         | 6.21±8.05                          | 5.66±4.65                          | 0.89±1.24                          | --                             |
|                          |                     | 4                        | 1.77±5.76                         | -2.39±4.69                         | -4.30±6.42                         | -16.71±2.56                        | <b>-35.54±1.24</b>                 | day 90                         |
|                          |                     | 25                       | <b>-27.22±2.19</b>                | <b>-60.16±1.44</b>                 | <b>-95.23±0.24</b>                 | <b>-100.00±0.00</b>                | <b>-100.00±0.00</b>                | day 7                          |
| Eutylone<br>(50 ng/mL)   | 50%MeOH             | -20                      | 7.20±2.15                         | 7.13±2.88                          | -1.20±2.67                         | 15.68±2.04                         | 10.45±6.36                         | --                             |
|                          |                     | 4                        | 8.05±2.12                         | 0.21±3.92                          | 11.65±4.60                         | 12.85±4.53                         | 9.04±8.90                          | --                             |
|                          |                     | 25                       | 8.97±5.02                         | -5.93±1.32                         | -13.70±3.35                        | <b>-25.78±2.29</b>                 | <b>-50.21±0.37</b>                 | day 60                         |
|                          | 50%MeOH (in 0.1%FA) | -20                      | 15.04±1.17                        | -0.85±0.77                         | 2.27±6.37                          | 7.94±4.02                          | 6.52±7.35                          | --                             |
|                          |                     | 4                        | 8.79±6.67                         | -1.21±6.11                         | 15.89±10.61                        | 11.56±6.86                         | 3.26±1.60                          | --                             |
|                          |                     | 25                       | 10.00±4.61                        | -0.43±2.22                         | 16.03±7.89                         | <b>26.74±3.54</b>                  | <b>25.18±10.92</b>                 | day 60                         |
|                          | Urine               | -20                      | 10.67±5.32                        | -12.33±2.54                        | 3.25±1.28                          | 2.45±0.75                          | -4.64±1.69                         | --                             |
|                          |                     | 4                        | 1.79±3.91                         | -9.28±5.27                         | -8.08±2.49                         | -2.52±3.38                         | <b>-23.92±0.64*</b>                | day 90                         |
|                          |                     | 25                       | -15.51±1.73                       | <b>-42.74±3.10</b>                 | <b>-79.26±1.09*</b>                | <b>-99.14±0.11</b>                 | <b>-99.80±0.00</b>                 | day 14                         |
| 50%MeOH                  | -20                 | 6.46±2.58                | 5.17±2.32                         | 1.77±0.66                          | 11.09±1.71                         | 5.17±2.86                          | --                                 |                                |

|                        |                     |                    |                    |                    |                     |                    |                    |        |
|------------------------|---------------------|--------------------|--------------------|--------------------|---------------------|--------------------|--------------------|--------|
| Ephylone<br>(50 ng/mL) | 50%MeOH (in 0.1%FA) | 4                  | 8.78±2.35          | -1.77±2.93         | 13.47±2.96          | 7.01±5.61          | 0.61±6.65          | --     |
|                        |                     | 25                 | 9.80±2.35          | -13.54±2.18        | <b>-25.17±2.29</b>  | <b>-48.57±2.16</b> | <b>-71.02±0.41</b> | day 30 |
|                        |                     | -20                | 8.76±3.82          | -7.73±3.00         | 0.77±1.86           | -0.71±5.42         | -8.05±3.10         | --     |
|                        | Urine               | 4                  | -0.97±2.82         | -9.47±6.23         | 11.34±5.76          | 2.64±5.13          | -4.77±3.06         | --     |
|                        |                     | 25                 | 2.90±3.70          | -9.15±2.53         | 11.92±4.19          | 14.05±0.51         | 16.11±1.96         | --     |
|                        |                     | -20                | 6.19±1.67          | -14.15±0.52        | 9.91±6.38           | -1.04±5.38         | -10.17±2.36        | --     |
|                        |                     | 4                  | 2.54±7.06          | -11.08±2.93        | -5.48±4.77          | -11.08±1.37        | <b>-36.11±1.47</b> | day 90 |
| 25                     | <b>-24.32±0.90</b>  | <b>-53.00±1.85</b> | <b>-89.44±0.52</b> | <b>-99.93±0.11</b> | <b>-99.93±0.11</b>  | day 7              |                    |        |
| 4-MEAPP<br>(50 ng/mL)  | 50%MeOH             | -20                | -2.09±1.85         | 1.40±0.50          | -1.08±5.49          | 4.50±2.58          | -5.64±3.11         | --     |
|                        |                     | 4                  | 0.89±1.81          | -5.01±2.45         | 3.30±1.90           | -0.06±3.88         | -10.34±6.34        | --     |
|                        |                     | 25                 | -1.59±2.23         | <b>-21.05±3.44</b> | <b>-44.71±1.05</b>  | <b>-72.92±1.40</b> | <b>-90.3±0.19</b>  | day 14 |
|                        | 50%MeOH (in 0.1%FA) | -20                | 0.86±3.10          | -8.12±0.91         | -9.23±5.65          | -6.28±2.68         | -13.05±1.51        | --     |
|                        |                     | 4                  | -2.22±5.00         | -9.60±5.84         | 8.55±9.79           | -0.98±6.76         | -11.14±2.62        | --     |
|                        |                     | 25                 | -1.23±1.33         | -6.34±4.06         | 7.2±1.57            | 10.71±4.06         | 7.94±1.02          | --     |
|                        |                     | -20                | -2.76±4.13         | -11.41±1.42        | 2.82±5.97           | -5.20±6.97         | -17.87±5.16        | --     |
| Urine                  | 4                   | -2.26±4.80         | -11.85±5.40        | -16.36±2.14        | <b>-29.59±1.28</b>  | <b>-53.98±1.09</b> | day 60             |        |
|                        | 25                  | <b>-37.81±1.52</b> | <b>-74.29±1.69</b> | <b>-98.43±0.11</b> | <b>-100.00±0.00</b> | <b>-99.69±0.29</b> | day 7              |        |
|                        | 25                  | 5.85±1.90          | 5.37±4.00          | 3.33±2.12          | 0.88±1.93           | -2.65±1.87         | --                 |        |
| PMA<br>(50 ng/mL)      | 50%MeOH             | 4                  | 6.94±2.41          | 4.08±1.27          | 0.27±6.20           | 6.87±3.70          | 0.34±1.36          | --     |
|                        |                     | 25                 | 6.67±4.17          | 2.93±1.74          | 1.50±2.26           | 7.55±2.32          | 3.13±3.06          | --     |
|                        |                     | -20                | 4.30±2.14          | 2.22±1.72          | -3.36±0.35          | -4.51±3.78         | -7.06±3.04         | --     |
|                        | 50%MeOH (in 0.1%FA) | 4                  | 5.78±0.91          | 1.75±0.91          | -1.41±3.79          | 1.14±1.51          | -6.39±2.62         | --     |
|                        |                     | 25                 | 4.10±2.25          | -0.13±0.61         | 5.51±2.71           | 10.09±1.72         | 17.82±1.45         | --     |
|                        |                     | -20                | 0.19±1.35          | -11.05±1.56        | -0.96±5.00          | -9.06±1.24         | -14.72±0.68        | --     |
|                        |                     | 4                  | -0.06±1.46         | -5.46±0.59         | -6.11±2.42          | 4.18±1.42          | -7.39±3.32         | --     |
| Urine                  | 25                  | 7.39±1.84          | -8.87±3.41         | -6.17±2.06         | 6.88±1.31           | -10.48±0.87        | --                 |        |
|                        | -20                 | 10.13±1.56         | 11.69±1.12         | 10.35±1.79         | 19.73±1.69          | 9.75±1.49          | --                 |        |
|                        | 4                   | 14.15±2.63         | 6.92±1.52          | 10.35±5.28         | 12.58±0.59          | 16.60±3.97         | --                 |        |
| PMMA<br>(50 ng/mL)     | 50%MeOH             | 25                 | 13.33±1.86         | 9.23±3.88          | 11.02±0.77          | 11.69±2.68         | 18.32±3.35         | --     |
|                        |                     | -20                | 5.44±1.76          | 5.08±1.21          | 6.09±4.04           | 12.69±0.58         | 6.09±2.63          | --     |
|                        |                     | 4                  | 7.47±0.78          | 2.47±2.30          | 9.14±4.26           | 14.94±0.33         | 8.92±3.91          | --     |
|                        | 50%MeOH (in 0.1%FA) | 25                 | 7.76±2.90          | 6.02±3.33          | 14.14±8.92          | <b>31.91±3.18</b>  | <b>36.84±1.32</b>  | day 60 |
|                        |                     | -20                | 7.36±4.61          | -3.79±1.46         | 9.36±3.94           | 11.72±4.34         | -2.00±0.43         | --     |
|                        |                     | 4                  | 8.01±2.44          | 3.65±1.26          | 3.29±3.90           | 15.30±4.41         | 0.64±1.38          | --     |
|                        |                     | 25                 | 8.72±3.54          | 0.29±1.73          | 0.57±3.33           | 16.01±0.43         | 3.00±3.84          | --     |
| DCK<br>(25 ng/mL)      | 50%MeOH             | -20                | 4.74±5.28          | 1.35±1.24          | 8.12±0.85           | 4.19±1.64          | 3.25±4.30          | --     |
|                        |                     | 4                  | 6.09±4.71          | -0.41±1.17         | 3.79±2.70           | 5.55±0.81          | 2.71±1.46          | --     |
|                        |                     | 25                 | 6.22±2.94          | 0.27±0.00          | 7.71±1.88           | 14.61±3.10         | 13.80±1.54         | --     |
|                        | 50%MeOH (in 0.1%FA) | -20                | 2.14±2.85          | -2.27±3.24         | 1.60±4.10           | -4.41±1.90         | -0.94±3.83         | --     |
|                        |                     | 4                  | 6.15±1.52          | -4.68±2.28         | 5.21±1.41           | 4.28±1.45          | 2.81±4.10          | --     |
|                        |                     | 25                 | 3.07±4.19          | -1.47±3.24         | 8.56±2.35           | 14.30±1.45         | <b>27.67±6.22</b>  | day 90 |
|                        |                     | -20                | -0.79±2.05         | -8.66±3.88         | 0.92±4.14           | -3.67±4.60         | -9.58±3.88         | --     |
| Urine                  | 4                   | 3.28±5.84          | -4.72±0.79         | -3.15±4.17         | 0.26±3.55           | -1.97±1.97         | --                 |        |
|                        | 25                  | 8.14±5.59          | -9.84±1.42         | -3.02±1.27         | -8.14±0.60          | -3.15±3.88         | --                 |        |

|                      |                     |     |            |            |            |                   |                   |        |
|----------------------|---------------------|-----|------------|------------|------------|-------------------|-------------------|--------|
| 2-FDCK<br>(25 ng/mL) | 50%MeOH             | -20 | -4.15±5.00 | -2.07±2.16 | 0.52±2.92  | 2.33±0.22         | -0.52±5.64        | --     |
|                      |                     | 4   | -1.94±4.47 | -4.79±3.75 | -7.77±1.84 | 7.38±5.25         | 2.72±4.28         | --     |
|                      |                     | 25  | 1.55±1.57  | -0.65±2.37 | -1.68±3.11 | 14.51±2.50        | 11.14±6.25        | --     |
|                      | 50%MeOH (in 0.1%FA) | -20 | 4.52±4.87  | 8.76±4.00  | 3.67±10.59 | 3.11±4.33         | 6.64±6.97         | --     |
|                      |                     | 4   | 9.89±3.40  | -0.14±0.65 | 5.51±1.53  | 10.03±3.60        | 12.99±1.29        | --     |
|                      |                     | 25  | 12.15±3.60 | 8.19±3.29  | 9.89±8.29  | <b>24.58±0.85</b> | <b>41.67±2.82</b> | day 60 |
|                      | Urine               | -20 | -0.66±5.84 | -9.84±2.58 | -5.38±1.86 | 1.71±5.52         | -6.04±2.17        | --     |
|                      |                     | 4   | 3.02±6.05  | -4.59±3.30 | -4.46±1.49 | 0.66±4.70         | 3.54±1.72         | --     |
|                      |                     | 25  | -2.76±4.77 | -6.43±0.82 | -5.25±4.34 | 2.23±2.77         | 4.59±4.60         | --     |

Bold\* values indicate the change in concentration > 20%. Mephedrone: 4-methylmethcathinone; Ephylone: N-ethylpentylone; 4-MEAPP: 4-methyl- $\alpha$ -ethylaminopentiophenone; PMA: para-methoxyamphetamine; PMMA: para-methoxymethamphetamine; DCK: deschloroketamine; 2-FDCK: 2-fluorodeschloroketamine; 50%MeOH: 50% methanol and 50% water; 50%MeOH (in 0.1%FA): 50% methanol/water with 0.1% formic acid.
